# Supplementary material
Source: PubMed Central journal article supplement (PMC5860839)
Supplement: DC170534SupplementaryData.pdf [file DC170534SupplementaryData.pdf]

SUPPLEMENTARY DATA

**SHORT LIST OF WHI INVESTIGATORS**

**Program Office:** (National Heart, Lung, and Blood Institute, Bethesda, Maryland) Jacques Rossouw, Shari Ludlam, Joan McGowan, Leslie Ford, and Nancy Geller

**Clinical Coordinating Center:** (Fred Hutchinson Cancer Research Center, Seattle, WA) Garnet Anderson, Ross Prentice, Andrea LaCroix, and Charles Kooperberg

**Investigators and Academic Centers:** (Brigham and Women's Hospital, Harvard Medical School, Boston, MA) JoAnn E. Manson; (MedStar Health Research Institute/Howard University, Washington, DC) Barbara V. Howard; (Stanford Prevention Research Center, Stanford, CA) Marcia L. Stefanick; (The Ohio State University, Columbus, OH) Rebecca Jackson; (University of Arizona, Tucson/Phoenix, AZ) Cynthia A. Thomson; (University at Buffalo, Buffalo, NY) Jean Wactawski-Wende; (University of Florida, Gainesville/Jacksonville, FL) Marian Limacher; (University of Iowa, Iowa City/Davenport, IA) Jennifer Robinson; (University of Pittsburgh, Pittsburgh, PA) Lewis Kuller; (Wake Forest University School of Medicine, Winston-Salem, NC) Sally Shumaker; (University of Nevada, Reno, NV) Robert Brunner; (University of Minnesota, Minneapolis, MN) Karen L. Margolis

**Women's Health Initiative Memory Study:** (Wake Forest University School of Medicine, Winston-Salem, NC) Mark Espeland

*For a list of all the investigators who have contributed to WHI science, please visit:*  
<https://www.whi.org/researchers/Documents%20%20Write%20a%20Paper/WHI%20Investigator%20Long%20List.pdf>

SUPPLEMENTARY DATA

**Supplementary Table S1.** Characteristics of Women’s Health Initiative Dietary Modification Trial participants who reported first use of oral diabetes agent during the trial

|                                                              | Intervention<br>(N=1228) |             | Comparison<br>(N=1951) |             | P-Value <sup>1</sup> |
|--------------------------------------------------------------|--------------------------|-------------|------------------------|-------------|----------------------|
|                                                              | N                        | %           | N                      | %           |                      |
| <b>Baseline Characteristics</b>                              |                          |             |                        |             |                      |
| Age, mean (SD)                                               | 62.1                     | (6.9)       | 62.1                   | (6.8)       | 0.90                 |
| Race/Ethnicity                                               |                          |             |                        |             | 0.70                 |
| White                                                        | 880                      | 71.7        | 1372                   | 70.3        |                      |
| Black                                                        | 232                      | 18.9        | 368                    | 18.9        |                      |
| Hispanic                                                     | 66                       | 5.4         | 112                    | 5.7         |                      |
| American Indian                                              | 5                        | 0.4         | 9                      | 0.5         |                      |
| Asian/Pacific Islander                                       | 32                       | 2.6         | 56                     | 2.9         |                      |
| Unknown                                                      | 13                       | 1.1         | 34                     | 1.7         |                      |
| Smoking                                                      |                          |             |                        |             | 0.07                 |
| Never                                                        | 632                      | 52.1        | 1008                   | 52.3        |                      |
| Past                                                         | 505                      | 41.6        | 758                    | 39.3        |                      |
| Current                                                      | 77                       | 6.3         | 163                    | 8.4         |                      |
| Family history of adult diabetes                             | 592                      | 51.6        | 935                    | 50.8        | 0.68                 |
| Baseline waist circumference ≥ 88cm                          | 932                      | 76.2        | 1522                   | 78.3        | 0.18                 |
| Baseline hypertension/CVD status                             |                          |             |                        |             | 0.43                 |
| Normotensive/no CVD                                          | 407                      | 36.1        | 611                    | 33.8        |                      |
| Hypertensive/no CVD                                          | 656                      | 58.3        | 1094                   | 60.5        |                      |
| Prior CVD                                                    | 63                       | 5.6         | 103                    | 5.7         |                      |
| Baseline BP/hypertension status                              |                          |             |                        |             | 0.40                 |
| BP < 140 and 90 mmHG; never treated                          | 418                      | 39.2        | 634                    | 36.8        |                      |
| BP ≥ 140 or 90 mmHG; never treated                           | 99                       | 9.3         | 173                    | 10.0        |                      |
| Ever treated for hypertension                                | 548                      | 51.5        | 917                    | 53.2        |                      |
| History of high cholesterol requiring medication             | 185                      | 15.1        | 333                    | 17.1        | 0.14                 |
| Metabolic syndrome score                                     |                          |             |                        |             | 0.49                 |
| 0                                                            | 92                       | 8.0         | 137                    | 7.4         |                      |
| 1                                                            | 317                      | 27.4        | 494                    | 26.7        |                      |
| 2                                                            | 635                      | 54.9        | 1007                   | 54.4        |                      |
| 3                                                            | 113                      | 9.8         | 213                    | 11.5        |                      |
| HT trial arm                                                 |                          |             |                        |             | 0.73                 |
| CEE                                                          | 64                       | 5.2         | 102                    | 5.2         |                      |
| CEE placebo                                                  | 61                       | 5.0         | 105                    | 5.4         |                      |
| CEE+MPA                                                      | 67                       | 5.5         | 107                    | 5.5         | 0.89                 |
| CEE+MPA placebo                                              | 69                       | 5.6         | 107                    | 5.5         |                      |
|                                                              | <b>Mean</b>              | <b>(SD)</b> | <b>Mean</b>            | <b>(SD)</b> |                      |
| Total energy expenditure/wk from physical activity (MET-hrs) | 7.3                      | (9.9)       | 7.9                    | (10.9)      | 0.20                 |
| Body mass index (kg/m <sup>2</sup> )                         | 32.6                     | (6.3)       | 32.6                   | (6.0)       | 0.98                 |
| Waist circumference (cm)                                     | 98.0                     | (14.6)      | 98.1                   | (13.3)      | 0.87                 |
| Systolic BP (mm Hg)                                          | 131.8                    | (16.4)      | 132.0                  | (16.6)      | 0.77                 |
| Diastolic BP (mm Hg)                                         | 77.6                     | (9.2)       | 77.5                   | (9.3)       | 0.88                 |
| LDL-C (mg/dL) <sup>2</sup>                                   | 135.6                    | (37.5)      | 132.2                  | (38.5)      | 0.54                 |
| HDL-C (mg/dL) <sup>2</sup>                                   | 53.1                     | (14.8)      | 52.2                   | (12.6)      | 0.67                 |
| Triglyceride (mg/dL) (Median/IQR) <sup>2</sup>               | 165.0                    | (117.0)     | 146.5                  | (102.5)     | 0.89                 |
| Glucose (mg/dL) (Median/IQR) <sup>2</sup>                    | 114.0                    | (25.0)      | 108.0                  | (28.5)      | 0.21                 |
| Time to pills (years)                                        | 5.1                      | (2.6)       | 4.9                    | (2.6)       | 0.049                |

Abbreviations: BP, blood pressure; CEE, conjugated equine estrogen; CVD, cardiovascular disease; HDL-C, high-density lipoprotein cholesterol; HT, hormone therapy; LDL-C, low-density lipoprotein cholesterol; MPA, medroxyprogesterone acetate.

<sup>1</sup> P-value corresponds to  $\chi^2$  tests (categorical variables), t-tests (continuous variables; not skewed), or Wilcoxon rank tests (continuous variables; skewed); for skewed variables, median (interquartile range) is presented.

<sup>2</sup> Laboratory measurements based on a 5.8% subsample of trial participants; includes 207 participants (79 vs. 128)

SUPPLEMENTARY DATA

**Supplementary Table S2. Diabetes outcomes<sup>1</sup> in the Women’s Health Initiative Dietary Modification Trial by study period**

|                                                                                                         | Intervention |         | Comparison |         | HR (95% CI)       | P-value |
|---------------------------------------------------------------------------------------------------------|--------------|---------|------------|---------|-------------------|---------|
|                                                                                                         | N            | %       | N          | %       |                   |         |
| <b>COHORT: NO DIABETES AT BASELINE<sup>2</sup></b>                                                      |              |         |            |         |                   |         |
| <b>Time to first report of pills (T1)</b>                                                               |              |         |            |         |                   |         |
| Intervention                                                                                            | 1228         | (0.83%) | 1951       | (0.88%) | 0.95 (0.88, 1.02) | 0.13    |
| Post intervention: Extension I                                                                          | 721          | (1.09%) | 1161       | (1.13%) | 0.96 (0.88, 1.05) | 0.39    |
| Post intervention: Extension II                                                                         | 616          | (1.48%) | 981        | (1.53%) | 0.96 (0.87, 1.06) | 0.46    |
| Cumulative                                                                                              | 2565         | (1.00%) | 4093       | (1.05%) | 0.96 (0.91, 1.00) | 0.07    |
| <b>COHORT: NO DIABETES AT BASELINE<sup>2</sup></b>                                                      |              |         |            |         |                   |         |
| <b>Time to first report of insulin (T2)</b>                                                             |              |         |            |         |                   |         |
| Intervention                                                                                            | 102          | (0.07%) | 207        | (0.09%) | 0.74 (0.59, 0.94) | 0.01    |
| Post intervention: Extension I                                                                          | 184          | (0.26%) | 326        | (0.29%) | 0.88 (0.73, 1.05) | 0.15    |
| Post intervention: Extension II                                                                         | 108          | (0.23%) | 158        | (0.22%) | 1.06 (0.83, 1.35) | 0.65    |
| Cumulative                                                                                              | 394          | (0.15%) | 691        | (0.17%) | 0.88 (0.78, 0.99) | 0.04    |
| <b>COHORT: NO DIABETES AT BASELINE, BUT LATER SELF-REPORT TAKING PILLS DURING FOLLOW-UP<sup>3</sup></b> |              |         |            |         |                   |         |
| <b>Time from pills to first report of insulin (T3)</b>                                                  |              |         |            |         |                   |         |
| Intervention                                                                                            | 102          | (2.63%) | 207        | (3.17%) | 0.82 (0.64, 1.04) | 0.10    |
| Post intervention: Extension I                                                                          | 184          | (3.20%) | 326        | (3.56%) | 0.90 (0.75, 1.08) | 0.27    |
| Post intervention: Extension II                                                                         | 108          | (1.88%) | 158        | (1.75%) | 1.04 (0.82, 1.34) | 0.73    |
| Cumulative                                                                                              | 394          | (2.56%) | 691        | (2.80%) | 0.95 (0.84, 1.09) | 0.49    |
| <b>COHORT: TAKING PILLS FOR DIABETES AT BASELINE</b>                                                    |              |         |            |         |                   |         |
| <b>Time to first report of insulin (T4)<sup>4</sup></b>                                                 |              |         |            |         |                   |         |
| Intervention                                                                                            | 140          | (3.60%) | 229        | (3.82%) | 0.92 (0.75, 1.14) | 0.47    |
| Post intervention: Extension I                                                                          | 47           | (3.78%) | 88         | (4.57%) | 0.85 (0.59, 1.23) | 0.39    |
| Post intervention: Extension II                                                                         | 19           | (3.45%) | 41         | (4.71%) | 0.75 (0.43, 1.33) | 0.33    |
| Cumulative                                                                                              | 206          | (3.62%) | 358        | (4.07%) | 0.89 (0.75, 1.06) | 0.21    |

<sup>1</sup> Summary statistics include counts of self-reported outcomes (annualized incidence rates), hazard ratios (95% CI), and p-values. Proportional hazards models were stratified by baseline age group and randomization arm of the WHI hormone therapy trials. The model for T3 was also stratified by time from randomization to pills, defined by quartiles specific to each study period. For T1, T2, and T4, the time-scale started at randomization for the intervention period or the start of each extension period. For T3, the time-scale started at self-report of pills.

## SUPPLEMENTARY DATA

<sup>2</sup> Full dietary trial cohort exclusive of women with diabetes at randomization.

<sup>3</sup> Participants among the full dietary trial cohort exclusive of women with diabetes at randomization who self-reported first use of oral agents during followup.

<sup>4</sup> Dietary trial participants with diabetes and taking oral agents at baseline.

SUPPLEMENTARY DATA

**Supplementary Figure S1.** Subgroup analysis for the time from randomization to first report of pills for diabetes during the intervention period among the full Women’s Health Initiative Dietary Modification Trial cohort, exclusive of women with diabetes at randomization (T1).

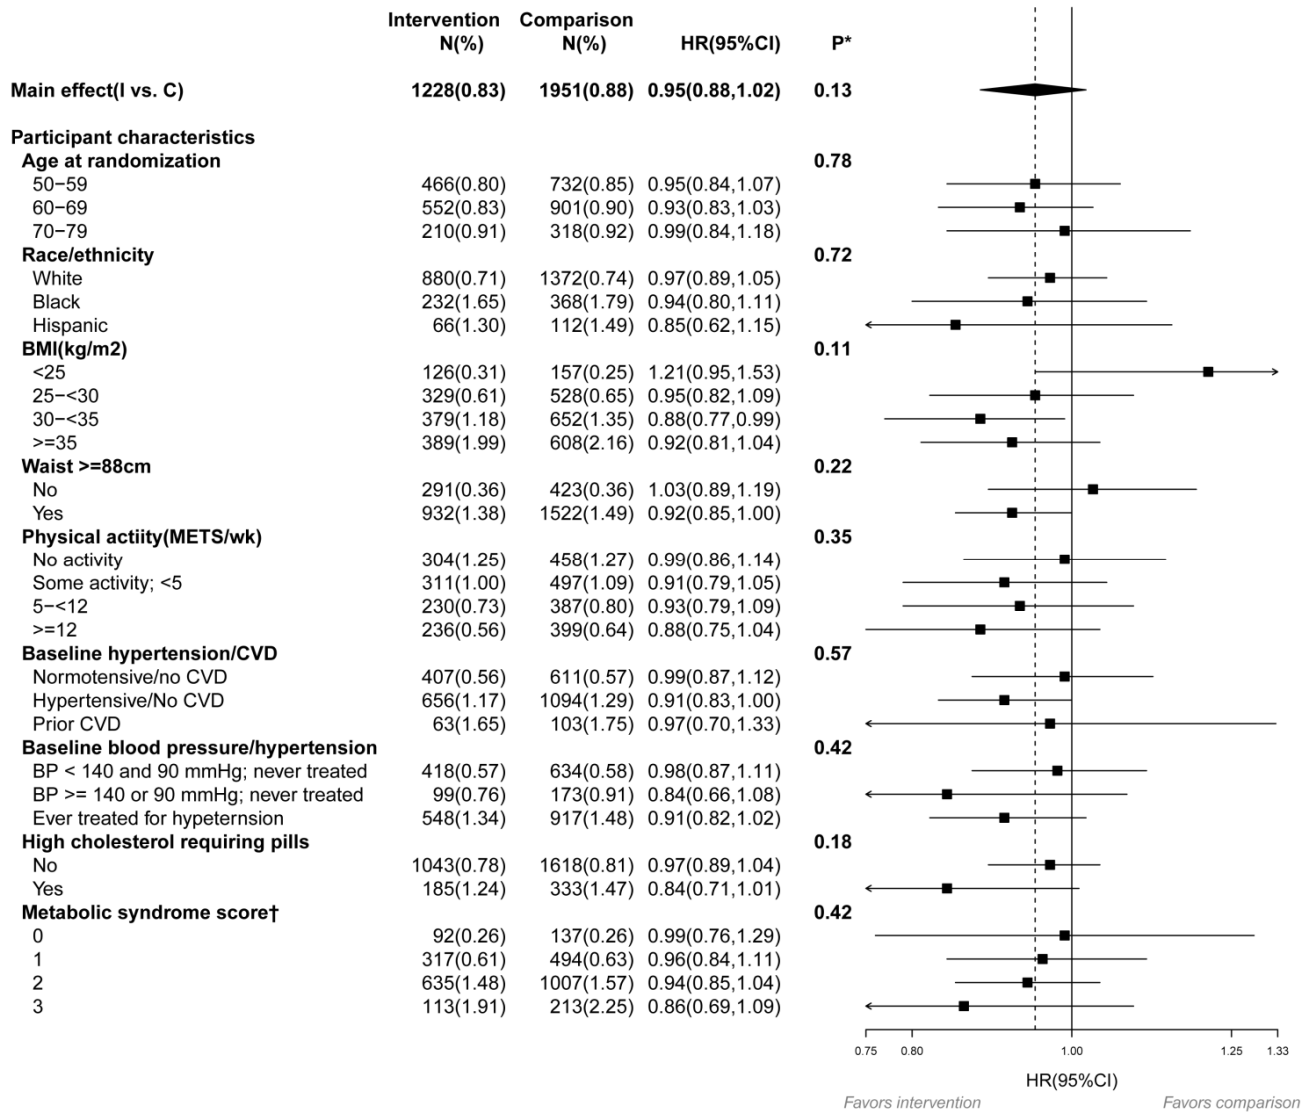

Abbreviations: BP, blood pressure; BMI, body mass index; CVD, cardiovascular disease.

\*Statistical significance of subgroups is based on a test of the interaction between subgroup and randomization group. For the subgroups of age, BMI, physical activity, blood pressure/hypertension, and metabolic syndrome score, a 1–df trend test of the interaction was used.

†Score ranges from 0 (best) to 3 (worst) and is a sum of these binary components: waist circumference ≥ 88 cm, high cholesterol requiring pills, or blood pressure ≥ 130/85 mmHg (or ever treated for hypertension).

SUPPLEMENTARY DATA

**Supplementary Figure S2.** Subgroup analysis for the time from pills to first report of insulin for diabetes during the intervention period among women self-reporting use of pills for diabetes during the intervention (T3).

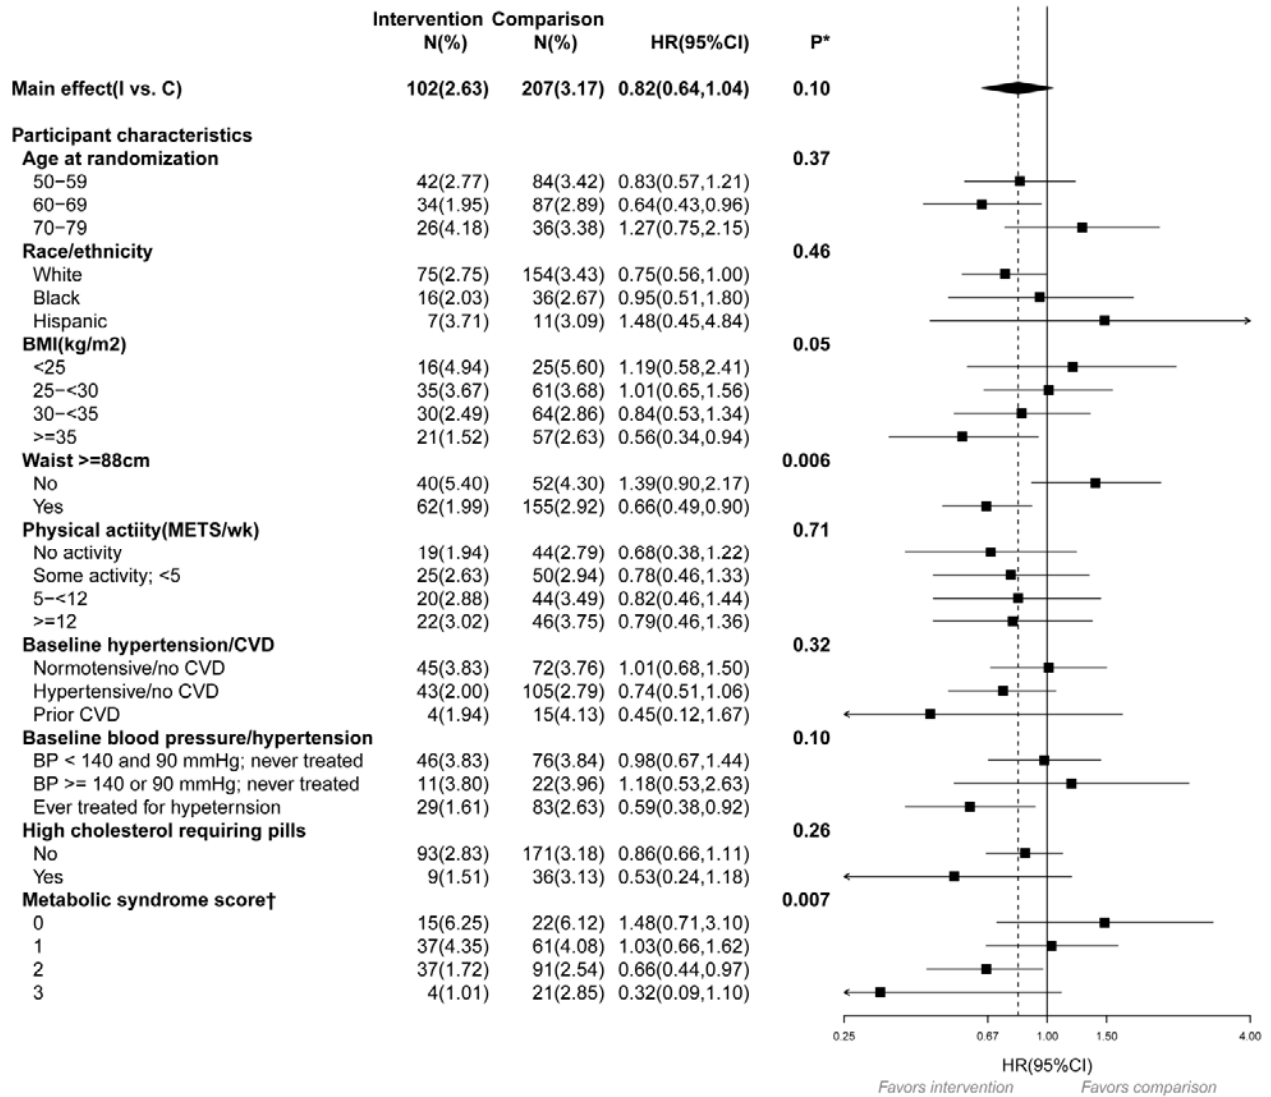

Abbreviations: BP, blood pressure; BMI, body mass index; CVD, cardiovascular disease.

\*Statistical significance of subgroups is based on a test of the interaction between subgroup and randomization group. For the subgroups of age, BMI, physical activity, blood pressure/hypertension, and metabolic syndrome score, a 1-df trend test of the interaction was used.

†Score ranges from 0 (best) to 3 (worst) and is a sum of these binary components: waist circumference ≥ 88 cm, high cholesterol requiring pills, or blood pressure ≥ 130/85 mmHg (or ever treated for hypertension).

SUPPLEMENTARY DATA

**Supplementary Figure S3.** Subgroup analysis for the time from randomization to first report of insulin for diabetes during the intervention period among women self-reporting use of pills for diabetes at baseline (**T4**).

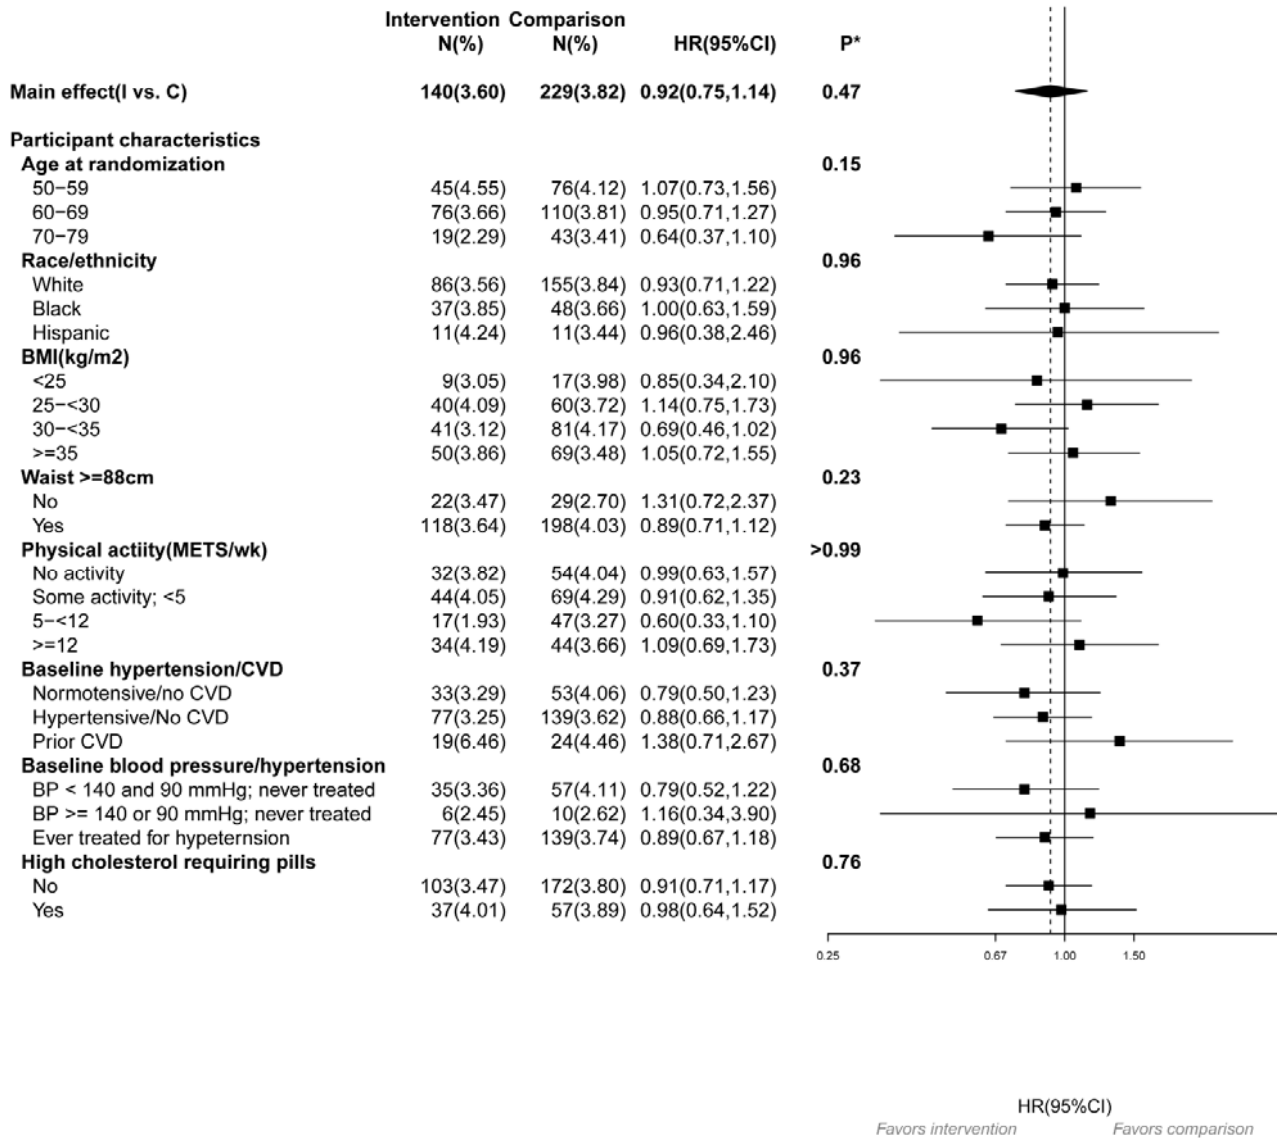

Abbreviations: BP, blood pressure; BMI, body mass index; CVD, cardiovascular disease.

\*Statistical significance of subgroups is based on a test of the interaction between subgroup and randomization group. For the subgroups of age, BMI, physical activity, blood pressure/hypertension, and metabolic syndrome score, a 1-df trend test of the interaction was used.
